# Supplementary material for: Embedding covariate adjustments in tree-based automated machine learning for biomedical big data analyses
Source: bioRxiv or medRxiv preprint supplement (doi:10.1101/2020.08.24.265116), 2020-08-24
Supplement: Supplementary file [file media-1.pdf]

## Additional file 1

### Leakage-free covariate adjustment

Let  $v$  be the target variable or feature which we want to adjust by covariates  $C_1, C_2, \dots, C_r$ . Denote by  $v_i$  and  $C_{i1}, C_{i2}, \dots, C_{ir}$  the observed values of  $v$  and the  $C$ s for subject  $i$ .

Suppose we are given a cross-validation split of the subjects into a training and a testing set.

#### Continuous $v$

If  $v$  is continuous, we use the **training set** to fit a linear regression model:

$$v = \beta_0 + \beta_1 C_1 + \beta_2 C_2 + \dots + \beta_r C_r.$$

For each subject  $i$  (**whether in the training or testing set**), we subtract the model-fitted values from  $v_i$ :

$$v_i^{\text{adj}} = v_i - (\hat{\beta}_0 + \hat{\beta}_1 C_{i1} + \hat{\beta}_2 C_{i2} + \dots + \hat{\beta}_r C_{ir}).$$

#### Binary $v$

If  $v$  is binary with values are 0 and 1, we use the **training set** to fit a logistic regression model:

$$\text{logit}(\pi) = \beta_0 + \beta_1 C_1 + \beta_2 C_2 + \dots + \beta_r C_r$$

where  $\pi = \text{Prob}(v = 1)$ .

For each subject  $i$  (**whether in the training or testing set**), we subtract the model-fitted values from the observed outcomes:

$$v_i^{\text{adj}} = v_i - \hat{\pi}_i$$

where

$$\hat{\pi}_i = \frac{\exp(\hat{\beta}_0 + \hat{\beta}_1 C_{i1} + \hat{\beta}_2 C_{i2} + \dots + \hat{\beta}_r C_{ir})}{1 + \exp(\hat{\beta}_0 + \hat{\beta}_1 C_{i1} + \hat{\beta}_2 C_{i2} + \dots + \hat{\beta}_r C_{ir})}.$$

#### Multiclass $v$

This is a simple extension of the binary case. If  $v$  is multiclass with values  $0, 1, \dots, K$ , we use the **training set** to fit a multinomial logistic regression model, deriving values  $\hat{\pi}_k$  for  $k = 1, \dots, K$ .

For each subject  $i$  (**whether in the training or testing set**), we subtract the model-fitted values from the observed outcomes:

$$v_i^{\text{adj}} = v_i - \sum_{k=1}^K \hat{\pi}_{ki} k.$$
