# Supplementary material for: Embedding covariate adjustments in tree-based automated machine learning for biomedical big data analyses
Source: bioRxiv or medRxiv preprint supplement (doi:10.1101/2020.08.24.265116), 2020-08-24

# Feature importances

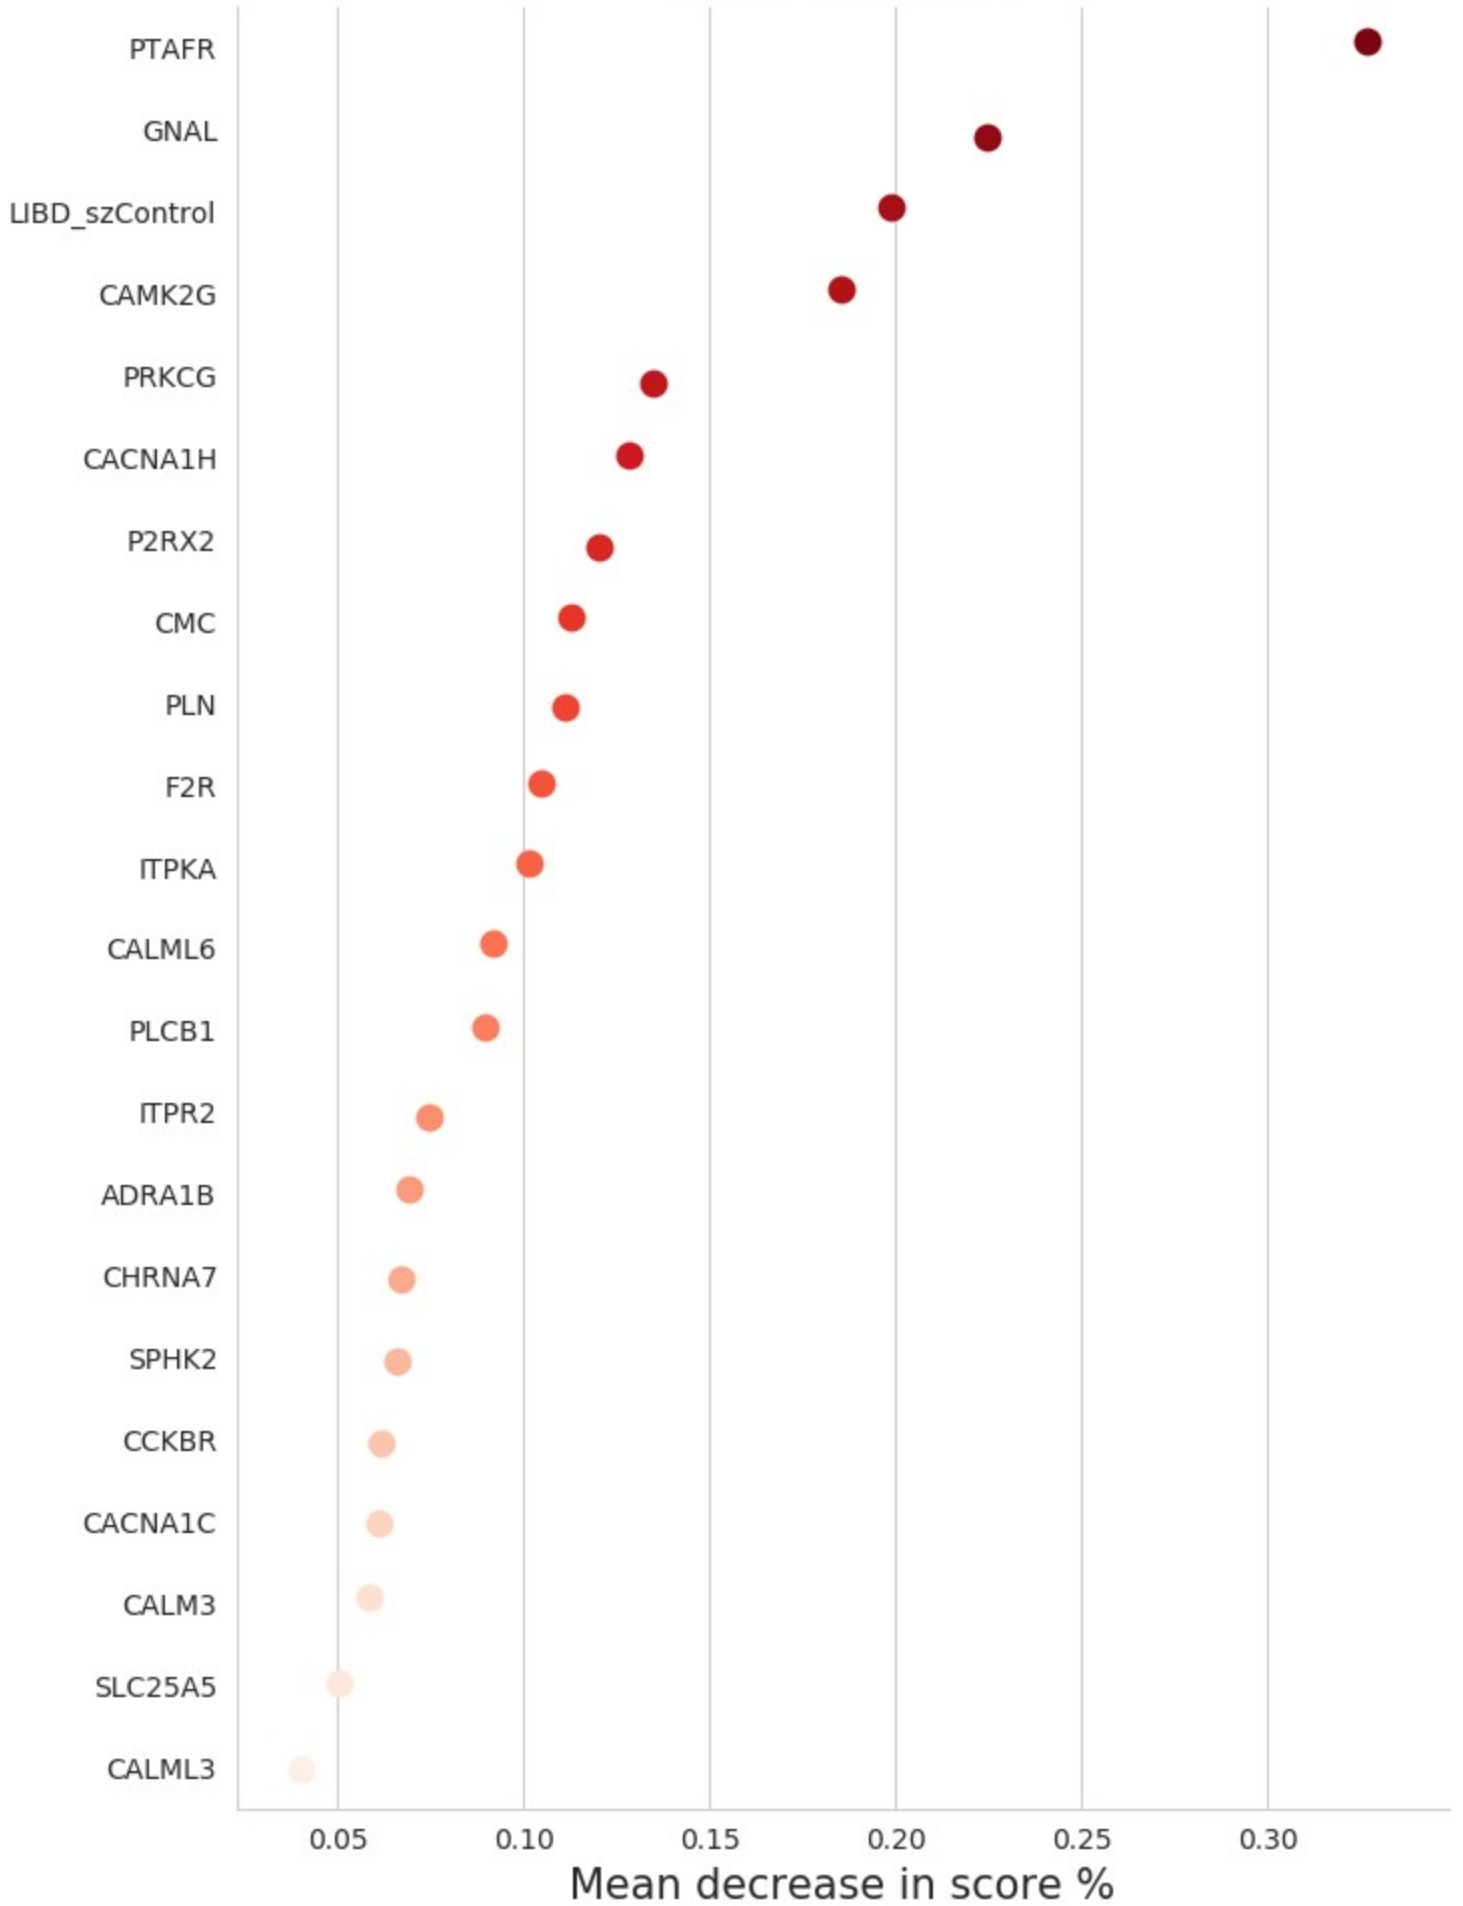

Supplement: Supplementary file [file media-6.pdf]
